# Supplementary material for: Tailoring quantum transport efficiency in molecular junctions via doping of graphene electrodes
Source: Royal Society of Chemistry journal article supplement (doi:10.1039/d3tc04761j), 2024-01-01
Supplement: d3tc04761j1.pdf [file d3tc04761j1.pdf]

## **Supplementary Information**

### **Tailoring Quantum Transport Efficiency in Molecular Junctions via Doping of Graphene Electrodes**

Xintai Wang,<sup>†</sup> Shanglong Ning,<sup>†</sup> Liyuan Lin,<sup>a</sup> Xiaoying Li,<sup>\*</sup> and Christopher J. B. Ford<sup>\*</sup>

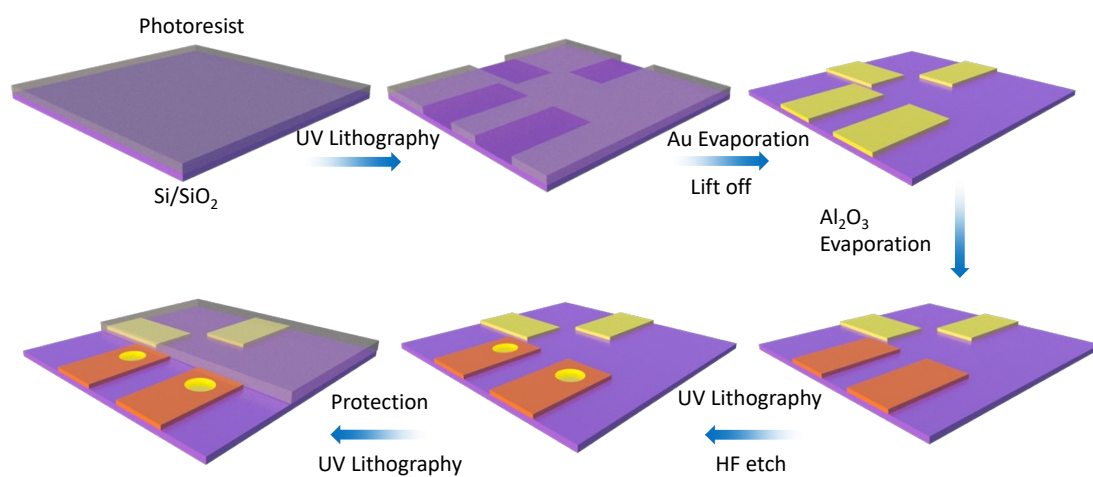

**Figure S1.** Flow chart of micro-well device fabrication.

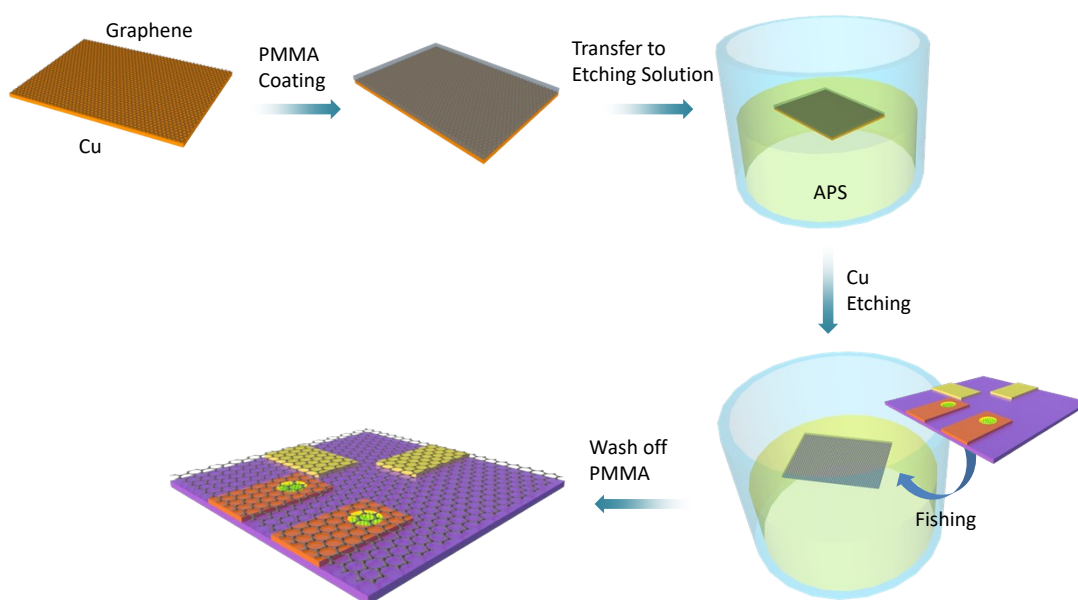

**Figure S2.** Flow chart of transferring graphene on top of a micro-well device

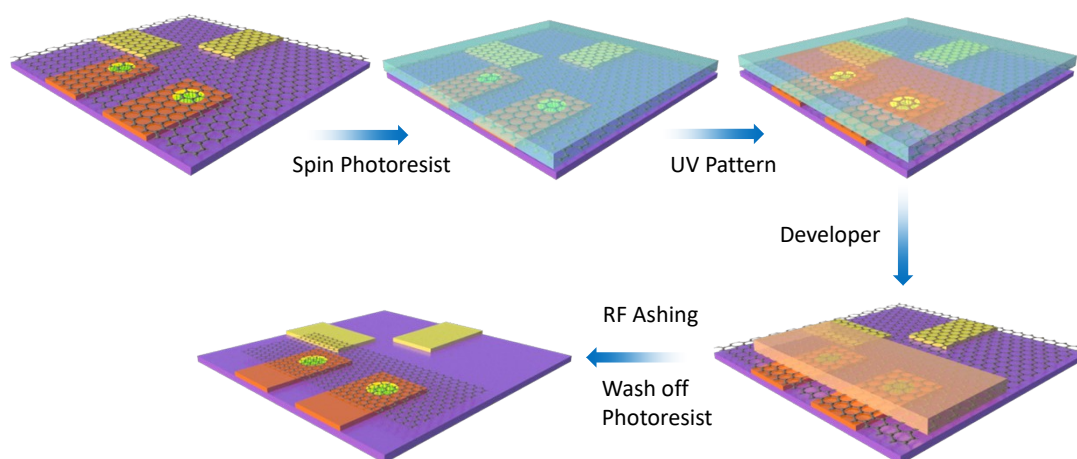

**Figure S3.** Flow chart of etching off unwanted graphene parts

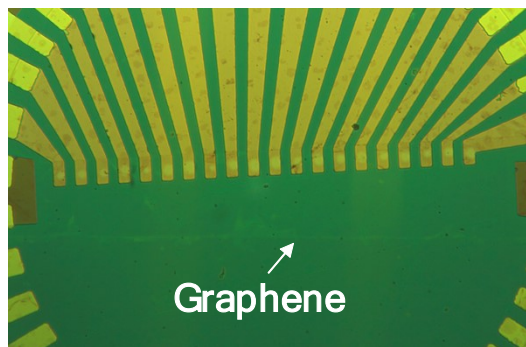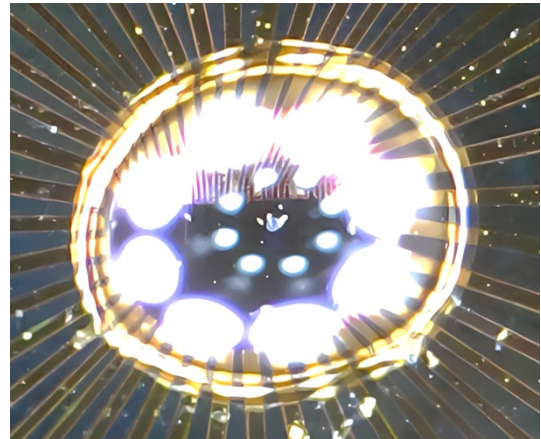

**Figure S4.** Microscopic picture of graphene covered device before (left) and after (right) ionic liquid dropping

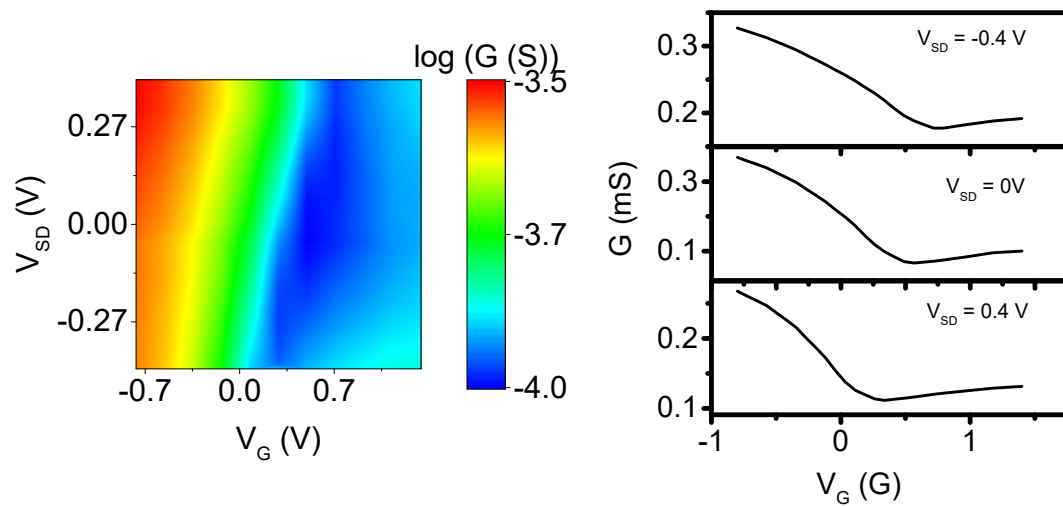

**Figure S5.** Graphene (before doping) conductance behavior vs. gate voltage, result indicate the graphene used in this work was p-doped.

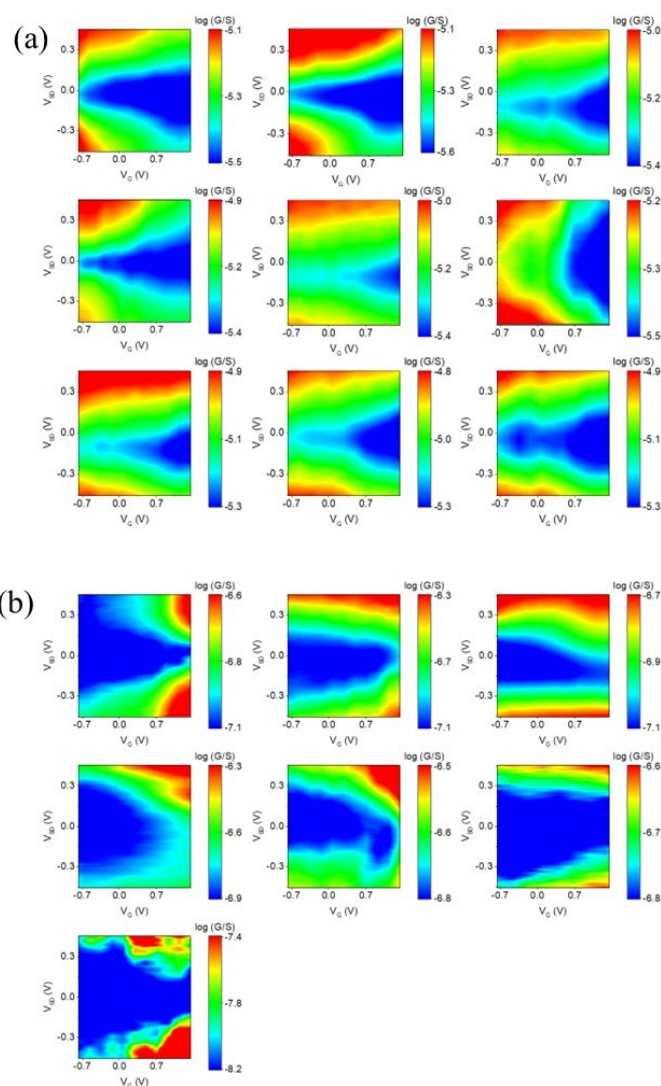

**Figure S6.** Gating behavior of SAM1 and SAM2 junction, which confirmed junction 1 is HOMO dominated and junction 2 is LUMO dominated.

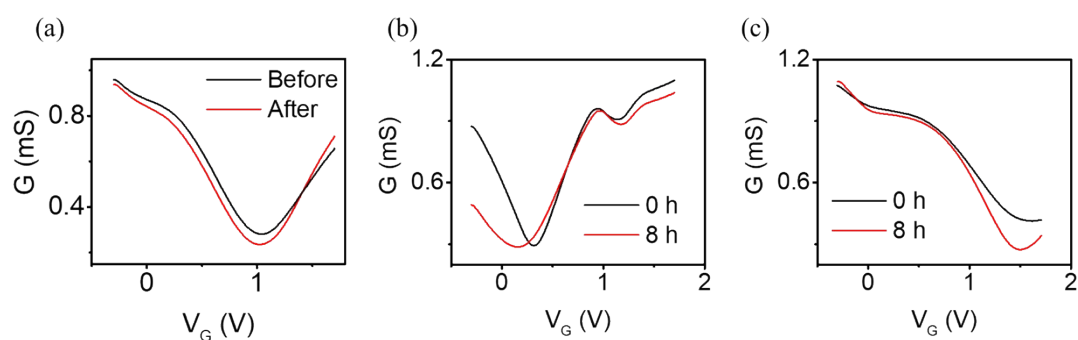

**Figure S7.** GV curves for non-doped graphene gated with an ionic liquid (a) before (black) and after (red) immersion in a DMF solution, and the GV curves for graphene doped with dopant 1 (b) and dopant 2 (c) immediately after the ionic liquid was dropped (black) and 8 hours after the drop (red).

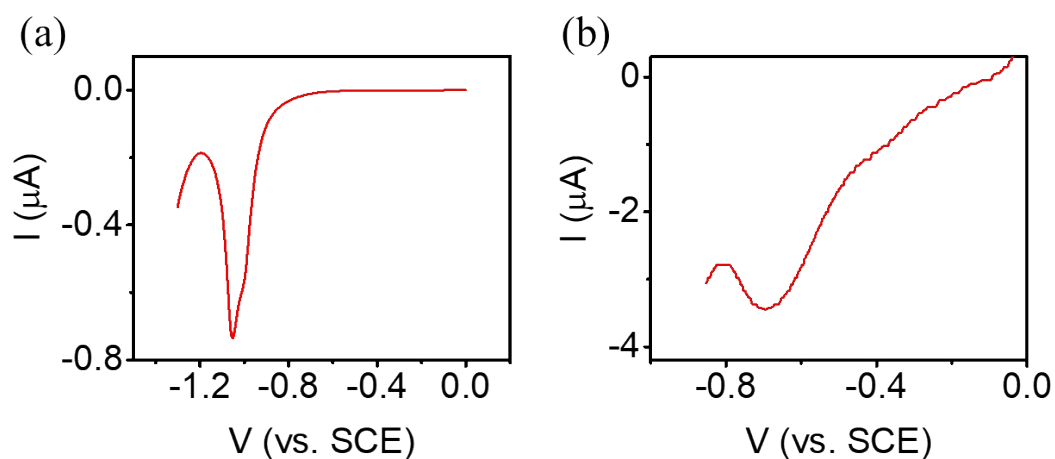

**Figure S8.** The reductive desorption of SAMs 1 (a) and 2 (b) in 1M NaOH solution.

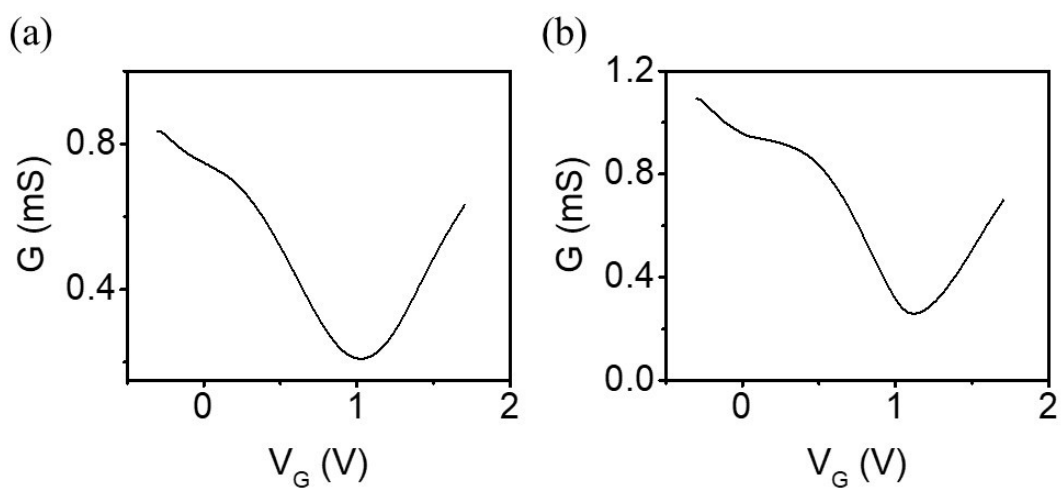

**Figure S9.** GV curves for non-doped graphene gated with ionic liquid while graphene was transferred on SAMs 1 (a) and 2 (b).

**Table S1** The surviving rate of measured junctions.

| SAMs           | Measured Junction | Survive Junction | Survival Rate |
|----------------|-------------------|------------------|---------------|
| 1              | 68                | 49               | 72%           |
| 1 <sup>a</sup> | 23                | 21               | 91%           |
| 1 <sup>b</sup> | 26                | 26               | 100%          |
| 2              | 68                | 37               | 55%           |
| 2 <sup>a</sup> | 21                | 18               | 86%           |
| 2 <sup>b</sup> | 16                | 14               | 88%           |

<sup>a</sup> Junction after graphene dopped with dopant 1, only survive SAMs junction were measured after doping.

<sup>b</sup> Junction after graphene dopped with dopant 2, only survive SAMs junction were measured after doping.

**Table S2** Summary of the reductive desorption of SAMs **1** and **2**.

| <b>SAMs</b>   | <b>E<sub>d</sub></b><br><b>(V vs. SCE)</b> | <b>Q</b><br><b>(C/cm<sup>2</sup>)</b> | <b>Packing density</b><br><b>(mol/cm<sup>2</sup>)<sup>a</sup></b> | <b>Molecular occupation Area</b><br><b>(Å<sup>2</sup>)</b> |
|---------------|--------------------------------------------|---------------------------------------|-------------------------------------------------------------------|------------------------------------------------------------|
| SAMs <b>1</b> | -1.1                                       | 4.9E-05                               | 5.1E-10                                                           | 32                                                         |
| SAMs <b>2</b> | -0.7                                       | 4.4E-05                               | 1.1E-10                                                           | 150                                                        |

<sup>a</sup> Packing density obtained via equation  $Q/A = nF\Gamma$ , F the Faraday's constant = 96500 C/mol, A the electrode area, n the number of electron transfer per molecular desorption, 1 for SAMs **1** and 4 for SAMs **2**.
